# Supplementary material for: Formation of PCDTBT:PC71BM p–n junction composite nanotubes via a templating method
Source: Royal Society of Chemistry journal article supplement (doi:10.1039/c5ra20549b), 2015-01-01
Supplement: c5ra20549b1.xlsx [file c5ra20549b1.xlsx]

## Sheet: Sheet1
10mg/ml-500rpm		15mg/ml-500rpm
0.57348	800	0.55557	800
0.57427	799	0.55574	799
0.57585	798	0.55616	798
0.57592	797	0.5561	797
0.5757	796	0.55572	796
0.5752	795	0.55663	795
0.57516	794	0.55671	794
0.57642	793	0.55756	793
0.57671	792	0.55649	792
0.57605	791	0.55676	791
0.57724	790	0.55801	790
0.57627	789	0.55764	789
0.57737	788	0.55818	788
0.57642	787	0.55855	787
0.57682	786	0.55835	786
0.57676	785	0.55829	785
0.57671	784	0.5591	784
0.57885	783	0.55871	783
0.57747	782	0.55861	782
0.57763	781	0.55929	781
0.57689	780	0.55883	780
0.5779	779	0.55912	779
0.57902	778	0.56046	778
0.57693	777	0.5605	777
0.57825	776	0.5599	776
0.57881	775	0.56082	775
0.57725	774	0.55979	774
0.57957	773	0.56128	773
0.57911	772	0.56103	772
0.5787	771	0.56201	771
0.57849	770	0.56171	770
0.57853	769	0.5613	769
0.57857	768	0.56148	768
0.57917	767	0.56192	767
0.57971	766	0.56277	766
0.57983	765	0.56293	765
0.57943	764	0.56352	764
0.57958	763	0.56402	763
0.57882	762	0.5634	762
0.58021	761	0.56412	761
0.58023	760	0.56375	760
0.58134	759	0.56516	759
0.58051	758	0.56488	758
0.58095	757	0.56499	757
0.58119	756	0.56539	756
0.58006	755	0.56495	755
0.58101	754	0.56603	754
0.58175	753	0.56579	753
0.58033	752	0.56593	752
0.58078	751	0.56615	751
0.58182	750	0.56611	750
0.58141	749	0.56657	749
0.58077	748	0.56642	748
0.58109	747	0.56706	747
0.58102	746	0.56675	746
0.58122	745	0.56722	745
0.58178	744	0.5683	744
0.58124	743	0.56786	743
0.58205	742	0.569	742
0.5823	741	0.56927	741
0.58197	740	0.569	740
0.58197	739	0.56922	739
0.58204	738	0.56929	738
0.58278	737	0.56974	737
0.58296	736	0.57025	736
0.58244	735	0.57052	735
0.58271	734	0.57099	734
0.58247	733	0.57081	733
0.58261	732	0.57106	732
0.58271	731	0.57182	731
0.5824	730	0.57227	730
0.58191	729	0.57286	729
0.58212	728	0.57261	728
0.58309	727	0.57345	727
0.58329	726	0.57394	726
0.5834	725	0.57426	725
0.5835	724	0.57455	724
0.58353	723	0.57459	723
0.58367	722	0.57573	722
0.58359	721	0.57549	721
0.58403	720	0.57624	720
0.58399	719	0.57677	719
0.5849	718	0.57735	718
0.58524	717	0.57766	717
0.58501	716	0.578	716
0.58546	715	0.5791	715
0.58533	714	0.57986	714
0.58616	713	0.58012	713
0.58659	712	0.58069	712
0.58668	711	0.5811	711
0.58615	710	0.58173	710
0.58646	709	0.58245	709
0.58675	708	0.58357	708
0.58728	707	0.58423	707
0.58779	706	0.58552	706
0.58753	705	0.58632	705
0.58874	704	0.58697	704
0.58905	703	0.58803	703
0.58955	702	0.58896	702
0.59038	701	0.5898	701
0.59054	700	0.59083	700
0.59088	699	0.59208	699
0.59204	698	0.59343	698
0.5921	697	0.59473	697
0.5934	696	0.59625	696
0.59422	695	0.59781	695
0.59533	694	0.59902	694
0.59612	693	0.60016	693
0.5967	692	0.60169	692
0.59819	691	0.60369	691
0.59863	690	0.60528	690
0.59988	689	0.60685	689
0.60245	688	0.60883	688
0.604	687	0.61149	687
0.60513	686	0.61406	686
0.60707	685	0.61635	685
0.60942	684	0.61872	684
0.61118	683	0.62133	683
0.61202	682	0.62437	682
0.61364	681	0.62718	681
0.61571	680	0.63003	680
0.61787	679	0.63332	679
0.62021	678	0.63695	678
0.62296	677	0.64094	677
0.62528	676	0.64488	676
0.62745	675	0.64899	675
0.63005	674	0.65334	674
0.63333	673	0.65786	673
0.63664	672	0.66295	672
0.63924	671	0.66846	671
0.64248	670	0.67418	670
0.64576	669	0.68039	669
0.64953	668	0.68637	668
0.6538	667	0.69277	667
0.65805	666	0.70005	666
0.66257	665	0.70786	665
0.66699	664	0.71549	664
0.67132	663	0.72397	663
0.67612	662	0.73305	662
0.68185	661	0.74196	661
0.68808	660	0.75151	660
0.69393	659	0.7613	659
0.70031	658	0.77224	658
0.70655	657	0.7839	657
0.71273	656	0.79502	656
0.71993	655	0.80612	655
0.72678	654	0.819	654
0.73403	653	0.83172	653
0.74189	652	0.84518	652
0.74996	651	0.85918	651
0.75986	650	0.87187	650
0.7687	649	0.88409	649
0.77679	648	0.89631	648
0.78718	647	0.91024	647
0.79653	646	0.92367	646
0.80585	645	0.93671	645
0.8158	644	0.94609	644
0.82617	643	0.95469	643
0.83661	642	0.9627	642
0.84762	641	0.96922	641
0.8577	640	0.97357	640
0.86816	639	0.97802	639
0.87899	638	0.98366	638
0.8888	637	0.98821	637
0.89767	636	0.99218	636
0.90741	635	0.99347	635
0.91726	634	0.99432	634
0.92449	633	0.99335	633
0.93327	632	0.99475	632
0.94029	631	0.99501	631
0.94759	630	0.99561	630
0.9536	629	0.99656	629
0.96108	628	0.99971	628
0.96931	627	0.99842	627
0.9715	626	0.99582	626
0.9718	625	0.9965	625
0.97601	624	0.99734	624
0.97902	623	1	623
0.98419	622	0.99837	622
0.98947	621	0.99815	621
0.99004	620	0.99608	620
0.98826	619	0.99674	619
0.99198	618	0.99767	618
0.99556	617	0.99711	617
0.99596	616	0.99533	616
0.99635	615	0.99478	615
0.99496	614	0.9947	614
0.99431	613	0.99281	613
0.99631	612	0.99496	612
0.99889	611	0.99446	611
1	610	0.99706	610
0.9939	609	0.99501	609
0.99593	608	0.99135	608
0.99346	607	0.99116	607
0.99457	606	0.98878	606
0.99451	605	0.99266	605
0.99582	604	0.9913	604
0.99218	603	0.99029	603
0.9902	602	0.98607	602
0.98884	601	0.98618	601
0.99058	600	0.98726	600
0.99065	599	0.9868	599
0.98672	598	0.98743	598
0.98837	597	0.98587	597
0.98877	596	0.98217	596
0.98723	595	0.98079	595
0.98457	594	0.97894	594
0.98373	593	0.97821	593
0.98261	592	0.98086	592
0.98245	591	0.98	591
0.97937	590	0.98055	590
0.9767	589	0.97387	589
0.97905	588	0.97284	588
0.97546	587	0.97177	587
0.97504	586	0.97564	586
0.97509	585	0.97106	585
0.97516	584	0.96885	584
0.97023	583	0.96723	583
0.97068	582	0.96725	582
0.96814	581	0.96548	581
0.96863	580	0.9672	580
0.96555	579	0.96639	579
0.96358	578	0.96351	578
0.95967	577	0.96088	577
0.95986	576	0.96083	576
0.95819	575	0.959	575
0.95765	574	0.95857	574
0.95768	573	0.95623	573
0.95298	572	0.95549	572
0.95169	571	0.95461	571
0.95198	570	0.95306	570
0.953	569	0.95145	569
0.94881	568	0.95316	568
0.94739	567	0.94875	567
0.94428	566	0.94764	566
0.94394	565	0.94357	565
0.9428	564	0.94558	564
0.94146	563	0.94088	563
0.9419	562	0.94179	562
0.93877	561	0.94095	561
0.9386	560	0.94053	560
0.93478	559	0.9416	559
0.93414	558	0.93799	558
0.92982	557	0.93576	557
0.92728	556	0.93461	556
0.92776	555	0.93249	555
0.92885	554	0.93313	554
0.9255	553	0.92511	553
0.92617	552	0.92863	552
0.92317	551	0.92357	551
0.91976	550	0.92471	550
0.91792	549	0.92148	549
0.91485	548	0.92339	548
0.91359	547	0.9178	547
0.91507	546	0.91799	546
0.90842	545	0.91765	545
0.908	544	0.91605	544
0.90252	543	0.91518	543
0.90267	542	0.91383	542
0.90375	541	0.91019	541
0.89989	540	0.90924	540
0.89521	539	0.9046	539
0.89723	538	0.90602	538
0.89315	537	0.90325	537
0.89212	536	0.90421	536
0.88911	535	0.90344	535
0.88788	534	0.89987	534
0.88392	533	0.89587	533
0.88343	532	0.89409	532
0.88258	531	0.89601	531
0.88133	530	0.89279	530
0.8761	529	0.89191	529
0.8737	528	0.89066	528
0.87365	527	0.88643	527
0.87231	526	0.88475	526
0.87259	525	0.88354	525
0.86705	524	0.88303	524
0.86487	523	0.87925	523
0.86157	522	0.87861	522
0.85981	521	0.87397	521
0.85943	520	0.87559	520
0.85669	519	0.87299	519
0.852	518	0.87169	518
0.85049	517	0.86907	517
0.84882	516	0.86682	516
0.84757	515	0.86531	515
0.84466	514	0.86592	514
0.84433	513	0.86334	513
0.84356	512	0.8609	512
0.83836	511	0.85892	511
0.83272	510	0.85767	510
0.83478	509	0.85659	509
0.8327	508	0.85654	508
0.83038	507	0.85264	507
0.82809	506	0.85151	506
0.82463	505	0.8514	505
0.82561	504	0.84542	504
0.82292	503	0.84545	503
0.82098	502	0.8432	502
0.81633	501	0.84187	501
0.81523	500	0.84098	500
0.81186	499	0.83909	499
0.80974	498	0.83804	498
0.81131	497	0.83606	497
0.80593	496	0.83718	496
0.80169	495	0.83575	495
0.80369	494	0.83341	494
0.80227	493	0.83029	493
0.79951	492	0.83031	492
0.79697	491	0.8329	491
0.79333	490	0.82907	490
0.7914	489	0.83121	489
0.78918	488	0.82341	488
0.78814	487	0.82593	487
0.78735	486	0.82199	486
0.7843	485	0.82696	485
0.78175	484	0.82241	484
0.77912	483	0.81977	483
0.77278	482	0.81957	482
0.77654	481	0.81742	481
0.7736	480	0.81551	480
0.77001	479	0.81564	479
0.76689	478	0.8164	478
0.76348	477	0.81353	477
0.76419	476	0.81255	476
0.75932	475	0.81173	475
0.75877	474	0.81106	474
0.75647	473	0.80806	473
0.75399	472	0.80727	472
0.75029	471	0.8087	471
0.74855	470	0.80845	470
0.74644	469	0.80672	469
0.7449	468	0.80345	468
0.74088	467	0.80135	467
0.73982	466	0.80143	466
0.74067	465	0.79999	465
0.73783	464	0.80203	464
0.73518	463	0.80242	463
0.73238	462	0.79889	462
0.72937	461	0.79836	461
0.73051	460	0.79894	460
0.72992	459	0.80026	459
0.72466	458	0.7979	458
0.72505	457	0.79496	457
0.72081	456	0.79399	456
0.71972	455	0.79703	455
0.72191	454	0.79698	454
0.71909	453	0.7965	453
0.71599	452	0.79561	452
0.7151	451	0.79736	451
0.71531	450	0.79548	450
0.71912	449	0.7968	449
0.71706	448	0.79625	448
0.71694	447	0.79269	447
0.71985	446	0.79469	446
0.72157	445	0.79677	445
0.72329	444	0.79404	444
0.72541	443	0.79456	443
0.72934	442	0.79786	442
0.73213	441	0.7954	441
0.73127	440	0.7975	440
0.73391	439	0.79664	439
0.73551	438	0.79601	438
0.74189	437	0.79543	437
0.74543	436	0.79321	436
0.7469	435	0.79535	435
0.74864	434	0.79606	434
0.75402	433	0.79896	433
0.75663	432	0.80059	432
0.75802	431	0.79821	431
0.76007	430	0.79458	430
0.75945	429	0.7952	429
0.76345	428	0.79854	428
0.76603	427	0.80047	427
0.76453	426	0.7997	426
0.76632	425	0.79812	425
0.7688	424	0.79567	424
0.77065	423	0.79621	423
0.77063	422	0.80114	422
0.76652	421	0.79924	421
0.76793	420	0.80028	420
0.76871	419	0.80183	419
0.76673	418	0.79642	418
0.77106	417	0.79553	417
0.77129	416	0.79806	416
0.77151	415	0.80064	415
0.76984	414	0.79986	414
0.77046	413	0.79748	413
0.77157	412	0.79776	412
0.77343	411	0.79992	411
0.77176	410	0.80136	410
0.77388	409	0.79898	409
0.77462	408	0.79831	408
0.76903	407	0.79814	407
0.76807	406	0.7961	406
0.77002	405	0.79487	405
0.77024	404	0.79522	404
0.76982	403	0.79549	403
0.76912	402	0.79697	402
0.76691	401	0.79755	401
0.76547	400	0.79541	400
0.76693	399	0.79313	399
0.76905	398	0.79122	398
0.77307	397	0.79364	397
0.76727	396	0.79611	396
0.76404	395	0.79623	395
0.76888	394	0.79452	394
0.76979	393	0.79284	393
0.7643	392	0.78735	392
0.76208	391	0.78693	391
0.76477	390	0.78723	390
0.76619	389	0.7886	389
0.76305	388	0.7908	388
0.75862	387	0.78925	387
0.757	386	0.7863	386
0.76074	385	0.78667	385
0.76313	384	0.78908	384
0.7607	383	0.78769	383
0.75869	382	0.78329	382
0.75495	381	0.78703	381
0.75781	380	0.7917	380
0.75859	379	0.78661	379
0.76352	378	0.78614	378
0.75581	377	0.78987	377
0.7566	376	0.79494	376
0.75154	375	0.79554	375
0.75617	374	0.79416	374
0.77336	373	0.79481	373
0.77224	372	0.789	372
0.75293	371	0.79636	371
0.75324	370	0.79329	370
0.75266	369	0.7839	369
0.74517	368	0.78731	368
0.74892	367	0.78191	367
0.74636	366	0.77615	366
0.74427	365	0.78122	365
0.75438	364	0.78274	364
0.75632	363	0.77941	363
0.74524	362	0.76344	362
0.73779	361	0.77224	361
0.73872	360	0.77866	360
0.72637	359	0.77921	359
0.72495	358	0.77898	358
0.72965	357	0.76328	357
0.72673	356	0.76348	356
0.72398	355	0.76957	355
0.72385	354	0.77318	354
0.72564	353	0.77891	353
0.71407	352	0.77363	352
0.7231	351	0.76538	351
0.71763	350	0.76792	350
0.72329	349	0.76099	349
0.71329	348	0.76294	348
0.70938	347	0.76143	347
0.71008	346	0.75428	346
0.70243	345	0.75291	345
0.70098	344	0.75254	344
0.69841	343	0.75461	343
0.70802	342	0.75504	342
0.70317	341	0.74599	341
0.68837	340	0.75252	340
0.6947	339	0.74978	339
0.68817	338	0.73089	338
0.68737	337	0.73418	337
0.69665	336	0.74347	336
0.68917	335	0.75123	335
0.67908	334	0.74434	334
0.67947	333	0.76313	333
0.68092	332	0.74788	332
0.68066	331	0.73705	331
0.6727	330	0.73294	330
0.67103	329	0.73973	329
0.64981	328	0.77157	328
0.67146	327	0.71521	327
0.65648	326	0.71597	326
0.65021	325	0.71868	325
0.65279	324	0.70584	324
0.6427	323	0.70441	323
0.64001	322	0.72088	322
0.65887	321	0.66802	321
0.63804	320	0.67278	320
0.6125	319	0.67625	319
0.59439	318	0.66105	318
0.58015	317	0.65876	317
0.57557	316	0.66203	316
0.58403	315	0.6596	315
0.54699	314	0.65017	314
0.57383	313	0.62934	313
0.53577	312	0.59732	312
0.52926	311	0.59105	311
0.52717	310	0.59853	310
0.46816	309	0.56619	309
0.4715	308	0.53777	308
0.44633	307	0.51854	307
0.48055	306	0.50896	306
0.41189	305	0.51782	305
0.38366	304	0.48482	304
0.37456	303	0.50095	303
0.33722	302	0.45444	302
0.34395	301	0.42345	301
0.32705	300	0.41169	300
0.31065	299	0.39595	299
0.28506	298	0.36709	298
0.23	297	0.36006	297
0.19863	296	0.32422	296
0.17571	295	0.30014	295
0.18853	294	0.28662	294
0.05732	293	0.24732	293
0.07013	292	0.20573	292
0.09737	291	0.24459	291
0.19579	290	0.21061	290
0.10927	289	0.16954	289
0.12549	288	0.22046	288
0.07606	287	0.18961	287
0.12739	286	0.23757	286
0.0104	285	0.171	285
0.09756	284	0.21249	284
0.17133	283	0.25871	283
0	282	0.17872	282
0.03813	281	0	281
0.15568	280	0.22035	280
0.07597	279	0.22197	279
0.12935	278	0.23809	278
0.1118	277	0.25524	277
0.18301	276	0.24721	276
0.07605	275	0.2295	275
0.11436	274	0.25667	274
0.0601	273	0.21116	273
0.10252	272	0.22237	272
0.1486	271	0.2877	271
0.09138	270	0.2258	270
0.20954	269	0.32724	269
0.09025	268	0.27722	268
0.14677	267	0.30124	267
0.19335	266	0.34758	266
0.1761	265	0.2828	265
0.16298	264	0.29553	264
0.19456	263	0.31705	263
0.16764	262	0.27174	262
0.1515	261	0.29545	261
0.24308	260	0.32865	260
0.14261	259	0.2987	259
0.19496	258	0.33909	258
0.19888	257	0.31118	257
0.17513	256	0.28963	256
0.2156	255	0.34206	255
0.19692	254	0.30967	254
0.18021	253	0.32033	253
0.20352	252	0.31057	252
0.18138	251	0.30759	251
0.22143	250	0.33749	250
